# Supplementary material for: A general route of fluoride coating on the cyclability regularity of high-voltage NCM cathodes
Source: Royal Society of Chemistry journal article supplement (doi:10.1039/d0cc04307a), 2020-01-01
Supplement: d0cc04307a1.pdf [file d0cc04307a1.pdf]

## Supporting information

# A general route of fluoride coating on the cyclability regularity of high-voltage NCM cathodes

Huixian Xie<sup>a</sup>, Ziyang Liang<sup>a</sup>, Dong Luo<sup>a,\*</sup>, Yaping Zhang<sup>b</sup>, Xiaokai Ding<sup>a</sup>, Jiaxiang Cui<sup>a</sup>, Zuhao Zhang<sup>a</sup>, Zhan Lin<sup>a,\*</sup>

<sup>a</sup>Guangzhou Key Laboratory of Clean Transportation Energy Chemistry, School of Chemical Engineering and Light Industry, Guangdong University of Technology, Guangzhou 510006, China.

E-mail: [luodong@gdut.edu.cn](mailto:luodong@gdut.edu.cn), [zhanlin@gdut.edu.cn](mailto:zhanlin@gdut.edu.cn)

<sup>b</sup>State Key Laboratory of Environment-friendly Energy Materials, School of Materials Science and Engineering, Southwest University of Science and Technology, Mianyang 621010, China.

## Experimental

### Preparation of precursor and $\text{LiNi}_{0.5}\text{Co}_{0.2}\text{Mn}_{0.3}\text{O}_2$

The target  $[\text{Ni}_{0.5}\text{Mn}_{0.3}\text{Co}_{0.2}](\text{OH})_2$  precursor was synthesized by hydro-thermal reaction. Nickel acetate, manganous acetate, cobaltous acetate and urea were dissolved in 26 mL alcohol and 39 mL  $\text{H}_2\text{O}$  to form uniform solution. After stirring, the solution was transferred into 100 mL Teflon-lined autoclave and kept at 180 °C in the oven for 24 hours. The precursor was obtained after filtering, washing and drying. With the stoichiometric amount of 1:1.05, the precursor  $[\text{Ni}_{0.5}\text{Mn}_{0.3}\text{Co}_{0.2}](\text{OH})_2$  was fully mixed with  $\text{Li}_2\text{CO}_3$ , and the mixture was calcined at 850 °C for 12 h in a muffle furnace to form large layered oxide particles.

### Fluoride coatings of $\text{LiNi}_{0.5}\text{Co}_{0.2}\text{Mn}_{0.3}\text{O}_2$

0.5, 1 and 2 mol%  $\text{AlF}_3$  were used to modify  $\text{LiNi}_{0.5}\text{Co}_{0.2}\text{Mn}_{0.3}\text{O}_2$  materials (NCM523) by simple wet chemical method. Aluminium nitrate ( $\text{Al}(\text{NO}_3)_3 \cdot 9\text{H}_2\text{O}$ ) was dissolved in 30 mL  $\text{H}_2\text{O}$  and then 0.3 g NCM523 powders were immersed into the aluminum nitrate solution. Ammonium fluoride ( $\text{NH}_4\text{F}$ ) was dissolved in 10 mL  $\text{H}_2\text{O}$  and the solution was added into the mixture drop by drop. The mixture was evaporated at 120 °C for about 8 hours. The obtained powders were calcined at 350 °C in tube furnace for 6 hours following the nitrogen. It was worth noting that 0.5, 1, 2 mol%  $\text{AlF}_3$  coatings are named as 0.5 $\text{AlF}_3$ ,  $\text{AlF}_3$  and 2 $\text{AlF}_3$  coated NCM523 samples, respectively. Other fluoride coatings including  $\text{BaF}_2$ ,  $\text{ZnF}_2$ ,  $\text{NiF}_2$ ,  $\text{CeF}_3$ ,  $\text{ZrF}_4$ ,  $\text{YF}_3$ ,  $\text{BiF}_3$ ,  $\text{PrF}_3$  and  $\text{SmF}_3$  were performed using the same as the above procedure.

### **Materials characterization**

X-ray diffraction (XRD, Rigaku MiniFlex600) with Cu  $K\alpha$  radiation ( $\lambda = 1.54059 \text{ \AA}$ ) was used to identify structure. Raman spectra were recorded on HROIBA Jobin Yvon (LabRAM HR Evolution) using the 532 nm line argon-ion laser. The morphology of the materials was observed by scanning electron microscopy (SEM, Hitach-SU8220, Japan). Transmission electron microscopy (TEM), high-resolution TEM (HRTEM) images were taken on FEI-Talos F200S, Czechs). X-ray Photoelectron Spectroscopy (Thermo fisher Scientific-K-Alpha<sup>+</sup>) was used to determine ion valence states.

### **Electrochemical measurement**

The positive electrode was prepared by 80 wt% synthesized material, 10 wt% super P, 10 wt% PVDF using the N-methyl-pyrrolidone as the solvent following. The slurry was coated on Al foil and dried at 120 °C in vacuum oven for 12 hours. The coin cell

was assembled in argon-filled glove box where the amount of water and oxygen is below 0.1 ppm. Lithium foil was used as the counter and reference electrode and the electrolyte was a solution of 1 mol L<sup>-1</sup> LiPF<sub>6</sub> dissolved in ethylene carbonate (EC) and diethyl carbonate (DEC) (1:1 in volume). The coin cells were charged and discharged on test instrument (LAND Electronic Co.) at room temperature.

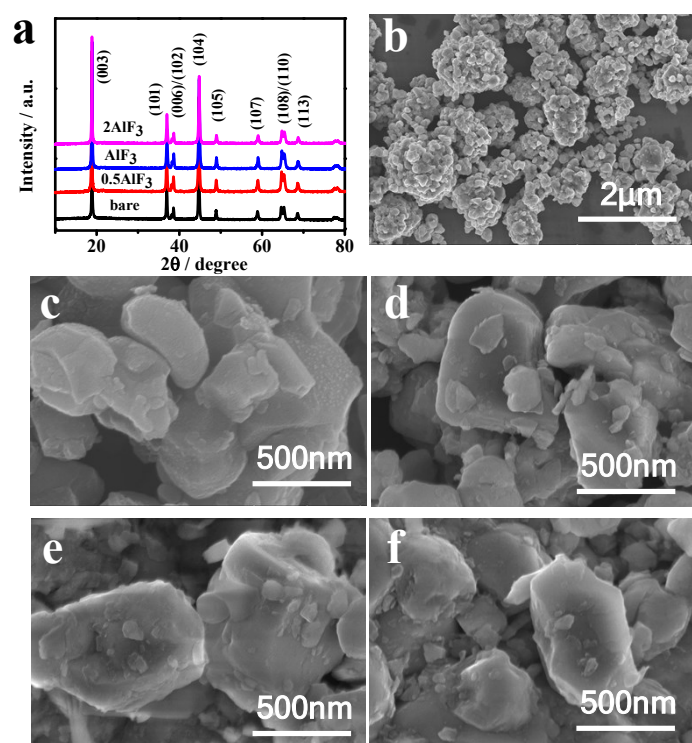

**Figure S1.** (a) XRD patterns of bare and different amount of AlF<sub>3</sub> coated NCM523 samples. SEM images of (b, c) bare, (d) 0.5AlF<sub>3</sub>, (e) AlF<sub>3</sub> and (f) 2AlF<sub>3</sub> coated NCM523 samples.

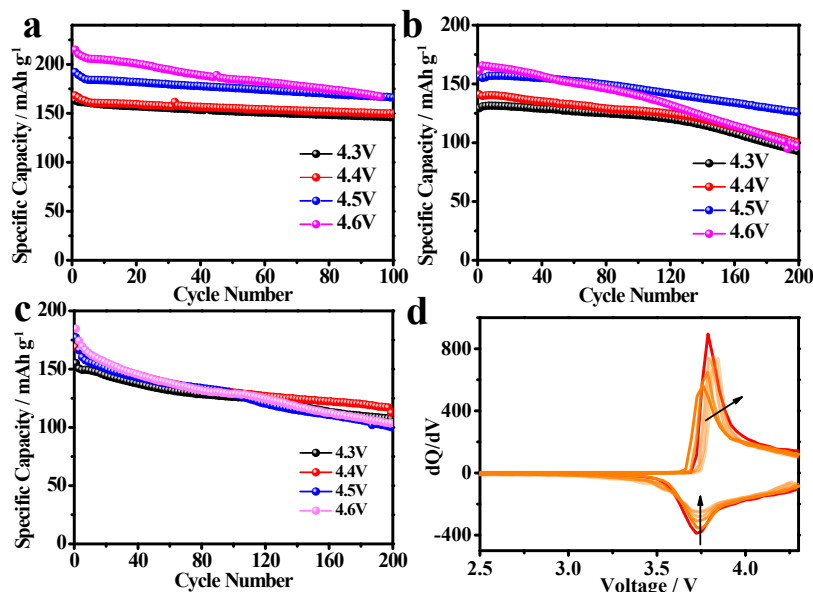

**Figure S2.** Cycling performance of (a)  $0.5\text{AlF}_3$ , (b)  $2\text{AlF}_3$  coated and (c) bare NCM523 samples at a current density of  $100\text{ mA g}^{-1}$  with different cutoff voltages. (d) The differential capacity versus voltage curve ( $dQ/dV$ ) performed in 1<sup>st</sup>, 10<sup>th</sup>, 20<sup>th</sup>, 30<sup>th</sup>, 40<sup>th</sup> and 50<sup>th</sup> cycles.

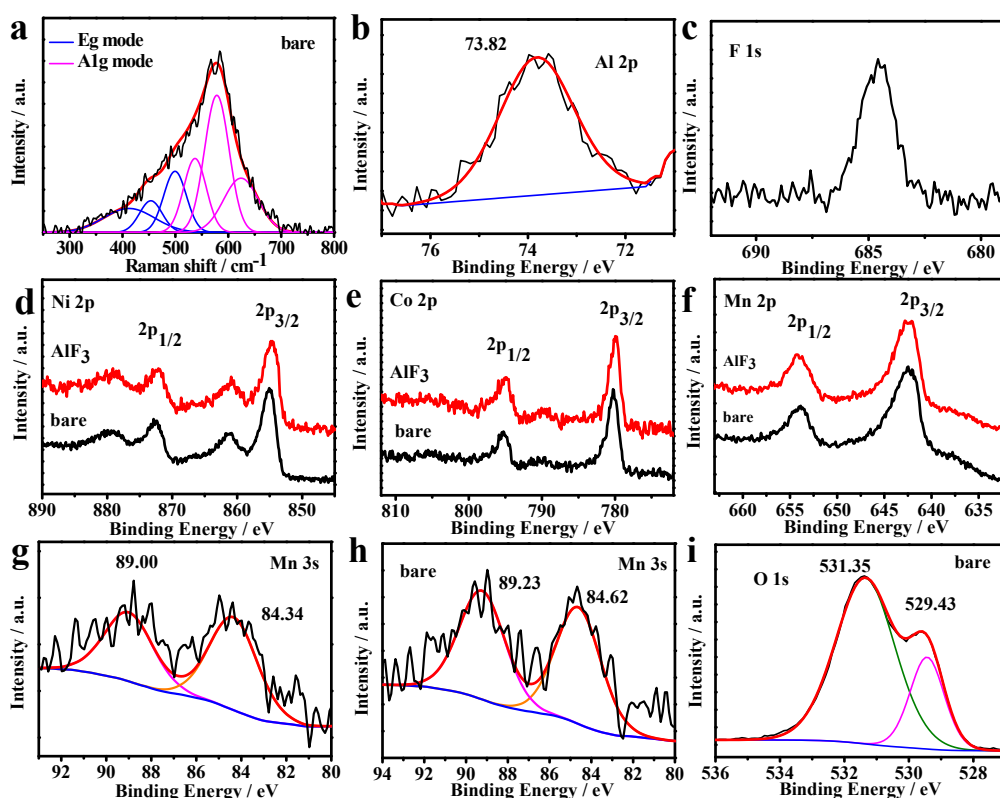

**Figure S3.** (a) Raman spectra of bare NCM523 sample. (b) Al 2p and (c) F 1s spectrum of  $\text{AlF}_3$  coated NCM523 sample. (d) Ni 2p, (e) Co 2p, (f) Mn 2p and (g, h) Mn 3s spectrum of bare and  $\text{AlF}_3$  coated NCM523 samples. (i) O 1s spectra of bare NCM523 sample.

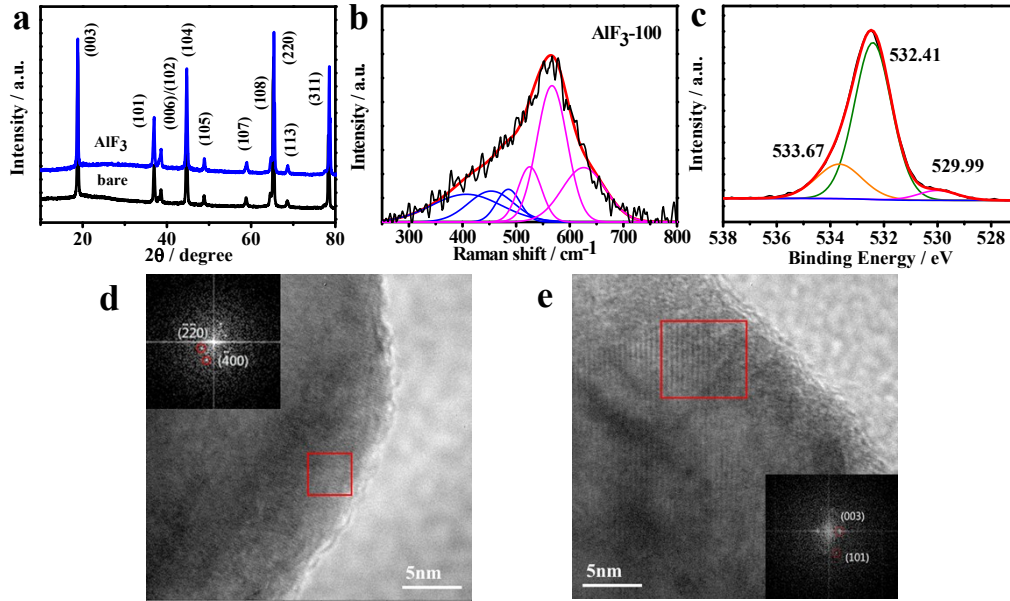

**Figure S4.** (a) XRD patterns of bare and AlF<sub>3</sub> coated NCM523 samples after 100 cycles. (b) Raman and (c) O 1s spectrum of AlF<sub>3</sub> coated NCM523 samples after 100 cycles. (d, e) HRTEM images and corresponding FFT patterns of bare and AlF<sub>3</sub> coated NCM523 samples after 100 cycles.

HRTEM with local FFT images were performed to confirm phase transformation. For bare NCM532 sample after 100 cycles, the *d*-spacings signed by red circle in **Figure S4 (d, e)** are separately  $\sim 2.93$  and  $\sim 2.08$  Å, corresponding to  $(\bar{2}\bar{2}0)$  and  $(\bar{4}00)$  planes of *Fd-3m* spinel structure. This means serious phase transformation has occurred during cycling. In cycled AlF<sub>3</sub> coated sample, the *d*-spacings of 4.89 and 2.41 Å suggest the two signed diffraction spots are assigned to (003) and (101) facets of *R-3m* layer structure. The structure stability benefits from the protection of AlF<sub>3</sub> coating.

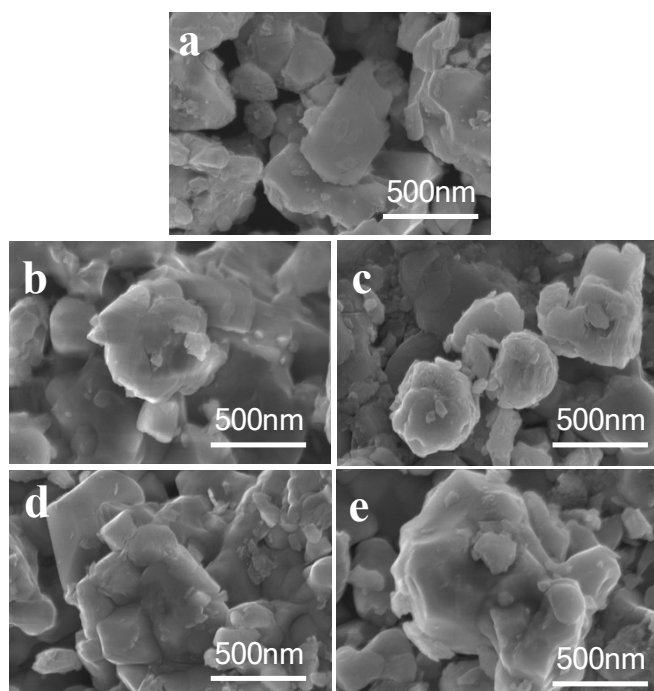

**Figure S5.** SEM images of (a)  $ZrF_4$ , (b)  $YF_3$ , (c)  $PrF_3$ , (d)  $BaF_2$  and (e)  $SmF_3$  coated NCM523 samples.

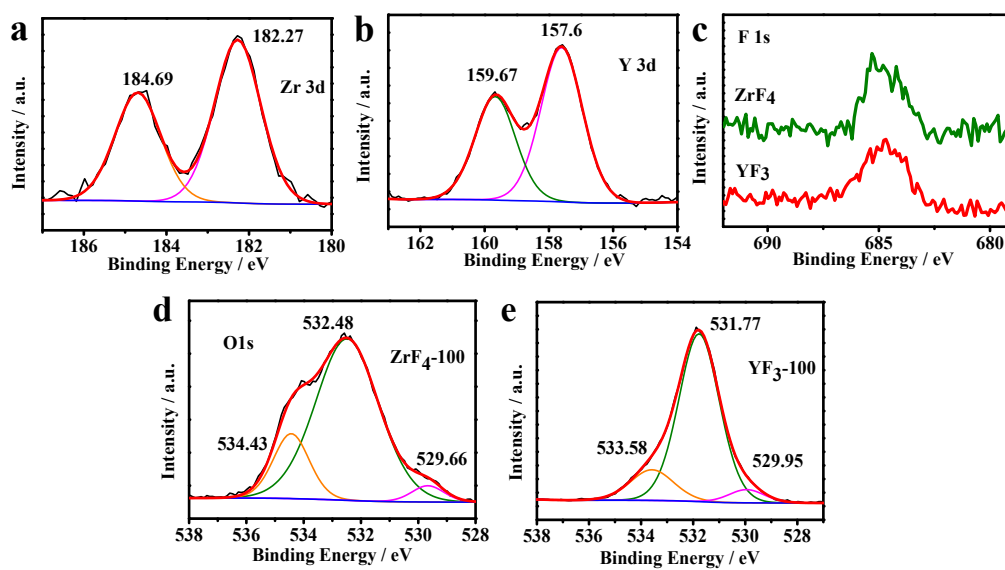

**Figure S6.** (a) Zr 3d and (b) Y 3d spectrum, (c) F 1s and (d, e) O 1s spectrum of  $ZrF_4$  and  $YF_3$  coated NCM523 samples.

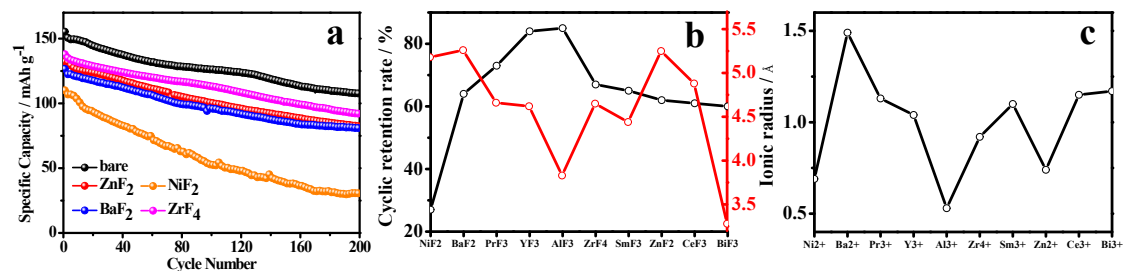

**Figure S7.** (a) Cycle performance of bare, ZnF<sub>2</sub>, BaF<sub>2</sub>, NiF<sub>2</sub> and ZrF<sub>4</sub> coated NCM523 samples at a current density of 100 mA g<sup>-1</sup>. Fluoride coatings of (b) pH and cyclic retention rate (c) ionic radius curves.
